# Supplementary material
Source: PubMed Central journal article supplement (PMC8505502)
Supplement: 41386_2021_1072_MOESM2_ESM.pdf [file 41386_2021_1072_MOESM2_ESM.pdf]

## Textcheck Certificate

---

|         |                                                                                                                             |
|---------|-----------------------------------------------------------------------------------------------------------------------------|
| Refnum: | 21030314                                                                                                                    |
| Title:  | Default Mode Network Dissociation Linking Cerebral Beta Amyloid Retention and Depression in Cognitively Normal Older Adults |
| Date:   | 2021/03/07                                                                                                                  |

We hereby certify that Textcheck has checked and corrected the English in the manuscript named above.

A specialist editor with suitable professional knowledge (M.Sc. or Ph.D./M.D.) reviewed and corrected the English. An English language specialist subsequently checked the paper again. The first language of both editors is English.

Please direct any questions regarding this certificate or the English in the certified paper to: [certified@textcheck.com](mailto:certified@textcheck.com)  
(Please quote our reference number: '21030314')
